# Supplementary material for: Practical and effective diagnosis of animal anthrax in endemic low-resource settings
Source: PubMed Central journal article supplement (PMC7513992; doi:10.1371/journal.pntd.0008655), 2020-09-14
Supplement: pntd.0008655.s002.pdf [file pntd.0008655.s002.pdf]

**S 1 Table. Primer and probe sequences used in the qPCR reactions, targeting two plasmids and one chromosomal sequence in the *Bacillus anthracis* genome**

| Name of primer/probe          | Sequence                                                             | Target                  | Reaction conditions        |
|-------------------------------|----------------------------------------------------------------------|-------------------------|----------------------------|
| BA cap fwd <sup>*</sup><br>TM | GAA GCA GTA GCA<br>CCA GTA AAA CAT C                                 | pXO2 plasmid            | 300 nM (0.6 µl of 10µM)    |
| BA cap rev <sup>δ</sup><br>TM | CTT TTA CGT GAC<br>GTC CCA TCA                                       | pXO2 plasmid            | 900 nM (1.8 µl of 10µM)    |
| BA cap prb <sup>γ</sup><br>TM | <b>FAM</b> TTG ACG ATG<br>ACG ATG GTT GGT<br>GAC A <b>BHQ1</b>       | pXO2 plasmid            | 250 nM (0.5 µl of 10µM)    |
| BA lef fwd <sup>*</sup><br>TM | GGA ACA AAA TAG<br>CAA TGA GGT ACA<br>AGA                            | pXO1 plasmid            | 900 nM (1.8 µl of 10µM)    |
| BA lef rev <sup>δ</sup><br>TM | TTC CGG TGC ATA<br>AAG CTG TAA AAC                                   | pXO1 plasmid            | 600 nM (1.2 µl of 10µM)    |
| BA lef prb <sup>γ</sup><br>TM | <b>FAM</b> TTG CAT ATT<br>ATA TCG AGC CAC<br>AGC ATC GTG <b>BHQ1</b> | pXO1 plasmid            | 250 nM (0.5 µl of 10µM)    |
| PL3_f <sup>*</sup>            | AAAGCTACAAACTCT<br>GAAATTTGTAAATTG                                   | Chromosomal<br>sequence | 250 nM (0.5 µl of<br>10µM) |
| PL3_r <sup>δ</sup>            | CAACGATGATTGGA<br>GATAGAGTATTCTTT                                    | Chromosomal<br>sequence | 250 nM (0.5 µl of<br>10µM) |
| Tqpro_PL3 <sup>γ</sup>        | <b>FAMA</b> ACAGTACGTTT<br>CACTGGAGCAAAAT<br>CAAB <b>BHQ1</b>        | Chromosomal<br>sequence | 150 nM (0.3 µl of<br>10µM) |

\* Forward primer

δ Reverse primer

γ Probe
