# Supplementary material for: Practical and effective diagnosis of animal anthrax in endemic low-resource settings
Source: PubMed Central journal article supplement (PMC7513992; doi:10.1371/journal.pntd.0008655), 2020-09-14
Supplement: pntd.0008655.s003.pdf [file pntd.0008655.s003.pdf]

**S 2 Table. Summary of samples and results for the 367 suspected anthrax cases investigated. Positive and negative samples are denoted with + and – respectively. PMB= polychrome methylene blue and NA implies no associated sample**

| ID | Method/Sample type   |     |        |              |                           |             |            |      |       |
|----|----------------------|-----|--------|--------------|---------------------------|-------------|------------|------|-------|
|    | Microscopy technique |     |        |              | Polymerase chain reaction |             |            |      |       |
|    | Azure B              | PMB | Giemsa | Rapi-Diff II | Blood smear               | Whole blood | Blood swab | Skin | Flies |
| 1  | +                    | +   | -      | -            | +                         | -           | +          | +    | NA    |
| 2  | +                    | +   | -      | -            | +                         | +           | +          | +    | NA    |
| 3  | -                    | -   | -      | -            | -                         | -           | -          | -    | NA    |
| 4  | -                    | -   | -      | -            | -                         | -           | -          | -    | NA    |
| 5  | +                    | +   | -      | +            | +                         | +           | +          | +    | NA    |
| 6  | +                    | +   | -      | -            | +                         | +           | +          | +    | NA    |
| 7  | +                    | +   | -      | -            | +                         | NA          | +          | +    | NA    |
| 8  | +                    | -   | -      | -            | +                         | NA          | +          | +    | NA    |
| 9  | +                    | +   | -      | -            | -                         | -           | +          | +    | NA    |
| 10 | -                    | -   | -      | -            | +                         | -           | +          | -    | NA    |
| 11 | -                    | -   | -      | -            | -                         | NA          | +          | -    | NA    |
| 12 | +                    | +   | -      | -            | +                         | +           | +          | +    | NA    |
| 13 | +                    | +   | -      | -            | +                         | +           | +          | +    | NA    |
| 14 | -                    | -   | -      | -            | +                         | +           | +          | +    | NA    |
| 15 | +                    | +   | -      | -            | +                         | NA          | +          | +    | NA    |
| 16 | +                    | +   | -      | +            | +                         | +           | +          | +    | NA    |
| 17 | -                    | -   | -      | -            | -                         | -           | NA         | -    | NA    |
| 18 | +                    | +   | -      | -            | +                         | NA          | +          | +    | NA    |
| 19 | -                    | -   | -      | -            | -                         | -           | -          | -    | NA    |
| 20 | +                    | +   | -      | -            | +                         | NA          | NA         | +    | NA    |
| 21 | -                    | NA  | -      | -            | -                         | -           | -          | -    | NA    |
| 22 | NA                   | NA  | NA     | NA           | NA                        | NA          | NA         | -    | NA    |
| 23 | NA                   | NA  | NA     | NA           | NA                        | NA          | NA         | -    | NA    |
| 24 | +                    | NA  | +      | -            | +                         | +           | +          | +    | NA    |
| 25 | NA                   | NA  | NA     | NA           | NA                        | +           | +          | +    | -     |
| 26 | +                    | NA  | -      | -            | +                         | +           | +          | +    | -     |
| 27 | +                    | NA  | -      | -            | +                         | -           | +          | +    | NA    |
| 28 | -                    | NA  | -      | -            | -                         | -           | -          | -    | -     |
| 29 | -                    | -   | -      | -            | -                         | -           | -          | -    | NA    |
| 30 | -                    | NA  | -      | -            | -                         | NA          | NA         | NA   | NA    |
| 31 | NA                   | NA  | NA     | NA           | NA                        | -           | -          | -    | -     |
| 32 | +                    | NA  | -      | -            | +                         | +           | +          | +    | NA    |
| 33 | -                    | NA  | -      | -            | -                         | -           | -          | -    | -     |









| ID  | Method/Sample material |     |        |           |                           |             |            |      |       |
|-----|------------------------|-----|--------|-----------|---------------------------|-------------|------------|------|-------|
|     | Microscopy             |     |        |           | Polymerase chain reaction |             |            |      |       |
|     | Azure B                | PMB | Giemsa | Rapi-Diff | Blood smear               | Whole blood | Blood swab | Skin | Flies |
| 186 | -                      | NA  | -      | -         | -                         | -           | -          | -    | NA    |
| 187 | NA                     | NA  | NA     | NA        | NA                        | NA          | -          | +    | NA    |
| 188 | -                      | +   | -      | +         | +                         | NA          | +          | -    | NA    |
| 189 | NA                     | NA  | NA     | NA        | NA                        | NA          | NA         | -    | NA    |
| 190 | NA                     | NA  | NA     | NA        | NA                        | NA          | NA         | +    | NA    |
| 191 | NA                     | NA  | NA     | NA        | NA                        | NA          | NA         | +    | NA    |
| 192 | -                      | -   | -      | -         | -                         | -           | -          | -    | NA    |
| 193 | NA                     | NA  | NA     | NA        | NA                        | NA          | NA         | +    | NA    |
| 194 | NA                     | NA  | NA     | NA        | NA                        | NA          | NA         | +    | NA    |
| 195 | NA                     | NA  | NA     | NA        | NA                        | NA          | NA         | -    | NA    |
| 196 | NA                     | NA  | NA     | NA        | NA                        | +           | +          | +    | NA    |
| 197 | +                      | +   | -      | +         | +                         | +           | +          | +    | NA    |
| 198 | +                      | +   | -      | -         | +                         | +           | +          | +    | NA    |
| 199 | +                      | +   | -      | -         | +                         | +           | +          | +    | NA    |
| 200 | +                      | +   | -      | -         | +                         | +           | +          | +    | NA    |
| 201 | NA                     | NA  | NA     | NA        | NA                        | NA          | NA         | +    | NA    |
| 202 | NA                     | NA  | NA     | NA        | NA                        | NA          | NA         | +    | NA    |
| 203 | NA                     | NA  | NA     | NA        | NA                        | NA          | NA         | +    | NA    |
| 204 | NA                     | NA  | NA     | NA        | NA                        | NA          | NA         | +    | NA    |
| 205 | NA                     | NA  | NA     | NA        | NA                        | NA          | NA         | +    | NA    |
| 206 | NA                     | NA  | NA     | NA        | NA                        | NA          | NA         | +    | NA    |
| 207 | +                      | +   | +      | -         | +                         | +           | +          | +    | NA    |
| 208 | NA                     | NA  | NA     | NA        | NA                        | NA          | NA         | +    | NA    |
| 209 | NA                     | NA  | NA     | NA        | NA                        | NA          | NA         | +    | NA    |
| 210 | NA                     | NA  | NA     | NA        | NA                        | NA          | NA         | +    | NA    |
| 211 | NA                     | NA  | NA     | NA        | NA                        | +           | +          | +    | NA    |
| 212 | NA                     | NA  | NA     | NA        | NA                        | NA          | NA         | +    | NA    |
| 213 | +                      | +   | -      | -         | +                         | +           | -          | +    | NA    |
| 214 | +                      | +   | -      | -         | +                         | +           | +          | +    | NA    |
| 215 | +                      | +   | +      | -         | +                         | NA          | +          | +    | NA    |
| 216 | NA                     | NA  | NA     | NA        | NA                        | NA          | NA         | +    | NA    |
| 217 | +                      | +   | -      | -         | +                         | -           | +          | +    | NA    |
| 218 | -                      | -   | -      | -         | -                         | -           | -          | -    | NA    |
| 219 | NA                     | NA  | NA     | NA        | NA                        | NA          | NA         | +    | NA    |
| 220 | NA                     | NA  | NA     | NA        | NA                        | NA          | NA         | +    | NA    |
| 221 | +                      | +   | +      | -         | +                         | +           | +          | +    | NA    |
| 222 | -                      | -   | -      | -         | -                         | NA          | -          | -    | NA    |
| 223 | NA                     | NA  | NA     | NA        | NA                        | NA          | -          | -    | NA    |







| ID  | Method/Sample material |     |        |           |                           |             |            |      |       |
|-----|------------------------|-----|--------|-----------|---------------------------|-------------|------------|------|-------|
|     | Microscopy             |     |        |           | Polymerase chain reaction |             |            |      |       |
|     | Azure B                | PMB | Giemsa | Rapi-Diff | Blood smear               | Whole blood | Blood swab | Skin | Flies |
| 300 | NA                     | NA  | NA     | NA        | NA                        | NA          | NA         | -    | NA    |
| 301 | NA                     | NA  | NA     | NA        | NA                        | NA          | NA         | +    | NA    |
| 302 | NA                     | NA  | NA     | NA        | NA                        | NA          | NA         | +    | NA    |
| 303 | NA                     | NA  | NA     | NA        | NA                        | NA          | NA         | +    | NA    |
| 304 | NA                     | NA  | NA     | NA        | NA                        | NA          | NA         | +    | NA    |
| 305 | -                      | -   | -      | -         | -                         | -           | -          | -    | NA    |
| 306 | NA                     | NA  | NA     | NA        | NA                        | NA          | NA         | +    | NA    |
| 307 | NA                     | NA  | NA     | NA        | NA                        | NA          | NA         | +    | NA    |
| 308 | NA                     | NA  | NA     | NA        | NA                        | NA          | NA         | +    | NA    |
| 309 | NA                     | NA  | NA     | NA        | NA                        | NA          | NA         | +    | NA    |
| 310 | NA                     | NA  | NA     | NA        | NA                        | NA          | NA         | -    | NA    |
| 311 | NA                     | NA  | NA     | NA        | NA                        | NA          | NA         | +    | NA    |
| 312 | NA                     | NA  | NA     | NA        | NA                        | NA          | NA         | +    | NA    |
| 313 | NA                     | NA  | NA     | NA        | NA                        | NA          | NA         | +    | NA    |
| 314 | NA                     | NA  | NA     | NA        | NA                        | NA          | NA         | -    | NA    |
| 315 | -                      | NA  | -      | -         | -                         | NA          | -          | -    | -     |
| 316 | -                      | NA  | -      | -         | -                         | NA          | NA         | NA   | NA    |
| 317 | -                      | NA  | -      | -         | -                         | NA          | NA         | NA   | NA    |
| 318 | -                      | NA  | -      | -         | -                         | NA          | NA         | NA   | NA    |
| 319 | +                      | NA  | -      | +         | +                         | NA          | NA         | NA   | NA    |
| 320 | +                      | NA  | -      | -         | +                         | NA          | NA         | NA   | NA    |
| 321 | NA                     | NA  | NA     | NA        | NA                        | NA          | NA         | +    | NA    |
| 322 | NA                     | NA  | NA     | NA        | NA                        | NA          | NA         | +    | NA    |
| 323 | NA                     | NA  | NA     | NA        | NA                        | NA          | NA         | +    | NA    |
| 324 | NA                     | NA  | NA     | NA        | NA                        | NA          | NA         | +    | NA    |
| 325 | NA                     | NA  | NA     | NA        | NA                        | NA          | NA         | -    | NA    |
| 326 | NA                     | NA  | NA     | NA        | NA                        | NA          | NA         | -    | NA    |
| 327 | NA                     | NA  | NA     | NA        | NA                        | NA          | NA         | +    | NA    |
| 328 | +                      | +   | +      | +         | +                         | +           | -          | +    | NA    |
| 329 | +                      | +   | +      | -         | +                         | +           | +          | +    | NA    |
| 330 | NA                     | NA  | NA     | NA        | NA                        | NA          | -          | -    | NA    |
| 331 | -                      | -   | -      | -         | -                         | -           | -          | -    | NA    |
| 332 | -                      | -   | -      | -         | -                         | -           | -          | -    | NA    |
| 333 | +                      | +   | +      | -         | +                         | +           | +          | +    | NA    |
| 334 | -                      | -   | -      | -         | -                         | -           | -          | +    | NA    |
| 335 | -                      | -   | -      | -         | -                         | -           | -          | -    | NA    |
| 336 | NA                     | NA  | NA     | NA        | NA                        | NA          | NA         | -    | NA    |
| 337 | NA                     | NA  | NA     | NA        | NA                        | +           | +          | +    | NA    |

| ID  | Method/Sample material |     |        |              |                           |             |            |      |       |
|-----|------------------------|-----|--------|--------------|---------------------------|-------------|------------|------|-------|
|     | Microscopy             |     |        |              | Polymerase chain reaction |             |            |      |       |
|     | Azure B                | PMB | Giemsa | Rapi-Diff II | Blood smear               | Whole blood | Blood swab | Skin | Flies |
| 338 | +                      | NA  | -      | -            | +                         | NA          | NA         | NA   | NA    |
| 339 | +                      | +   | +      | -            | +                         | NA          | NA         | NA   | NA    |
| 340 | NA                     | NA  | NA     | NA           | NA                        | +           | -          | -    | -     |
| 341 | +                      | NA  | -      | -            | +                         | NA          | NA         | NA   | NA    |
| 342 | -                      | NA  | -      | -            | -                         | NA          | NA         | NA   | NA    |
| 343 | +                      | NA  | -      | -            | +                         | NA          | NA         | NA   | NA    |
| 344 | NA                     | NA  | NA     | NA           | NA                        | +           | +          | +    | +     |
| 345 | NA                     | NA  | NA     | NA           | NA                        | NA          | NA         | +    | NA    |
| 346 | +                      | NA  | -      | -            | +                         | NA          | NA         | NA   | NA    |
| 347 | -                      | NA  | -      | -            | -                         | NA          | NA         | -    | NA    |
| 348 | +                      | NA  | -      | +            | +                         | NA          | NA         | NA   | NA    |
| 349 | +                      | NA  | -      | +            | +                         | NA          | NA         | NA   | NA    |
| 350 | -                      | NA  | -      | -            | -                         | NA          | NA         | NA   | NA    |
| 351 | NA                     | NA  | NA     | NA           | NA                        | NA          | NA         | +    | NA    |
| 352 | NA                     | NA  | NA     | NA           | NA                        | NA          | NA         | +    | NA    |
| 353 | NA                     | NA  | NA     | NA           | NA                        | NA          | NA         | -    | NA    |
| 354 | +                      | +   | -      | -            | +                         | +           | +          | +    | -     |
| 355 | +                      | +   | +      | -            | +                         | +           | +          | +    | -     |
| 356 | -                      | NA  | -      | -            | -                         | -           | -          | -    | -     |
| 357 | -                      | NA  | +      | -            | +                         | +           | +          | +    | -     |
| 358 | +                      | NA  | -      | -            | +                         | +           | -          | -    | -     |
| 359 | -                      | -   | -      | -            | -                         | -           | -          | -    | NA    |
| 360 | -                      | -   | -      | -            | -                         | -           | -          | -    | NA    |
| 361 | -                      | NA  | -      | -            | +                         | NA          | NA         | NA   | NA    |
| 362 | -                      | NA  | -      | -            | -                         | NA          | NA         | NA   | NA    |
| 363 | -                      | NA  | -      | -            | -                         | NA          | NA         | NA   | NA    |
| 364 | NA                     | NA  | NA     | NA           | NA                        | NA          | NA         | -    | NA    |
| 365 | -                      | NA  | -      | -            | -                         | NA          | NA         | NA   | NA    |
| 366 | +                      | NA  | -      | -            | +                         | NA          | NA         | NA   | NA    |
| 367 | -                      | NA  | -      | -            | -                         | NA          | NA         | NA   | NA    |
