# Supplementary material for: Practical and effective diagnosis of animal anthrax in endemic low-resource settings
Source: PubMed Central journal article supplement (PMC7513992; doi:10.1371/journal.pntd.0008655), 2020-09-14
Supplement: pntd.0008655.s004.pdf [file pntd.0008655.s004.pdf]

**S 3 Table: Characteristics of the animal carcasses suspected to have died from anthrax, from which samples were collected**

| <b>Variable</b>                                                      | <b>Number of samples with data (%)</b> | <b>Number of samples with missing values (%)</b> |
|----------------------------------------------------------------------|----------------------------------------|--------------------------------------------------|
| <b>Species</b>                                                       | <b>345 (94.0)</b>                      | <b>22 (6.0)</b>                                  |
| Cattle                                                               | 34 (9.3)                               |                                                  |
| Goat                                                                 | 37 (10.1)                              |                                                  |
| Sheep                                                                | 247 (67.3)                             |                                                  |
| Donkey                                                               | 17 (4.6)                               |                                                  |
| Giraffe                                                              | 3 (0.8)                                |                                                  |
| Antelope                                                             | 1 (0.3)                                |                                                  |
| Wildebeest                                                           | 2 (0.5)                                |                                                  |
| Zebra                                                                | 3 (0.8)                                |                                                  |
| Elephant                                                             | 1 (0.3)                                |                                                  |
|                                                                      |                                        |                                                  |
| <b>Age</b>                                                           | <b>330 (89.9)</b>                      | <b>37 (10.1)</b>                                 |
| Juvenile                                                             | 38 (10.4)                              |                                                  |
| Sub-adult                                                            | 75 (20.4)                              |                                                  |
| Adult                                                                | 217 (59.1)                             |                                                  |
|                                                                      |                                        |                                                  |
| <b>Sex</b>                                                           | <b>172 (46.9)</b>                      | <b>195 (53.1)</b>                                |
| Female                                                               | 116 (31.6)                             |                                                  |
| Male                                                                 | 56 (15.3)                              |                                                  |
|                                                                      |                                        |                                                  |
| <b>Body condition prior to death (livestock species only, n=335)</b> | <b>301 (89.9)</b>                      | <b>34 (10.1)</b>                                 |
| Fat                                                                  | 162 (48.4)                             |                                                  |
| Normal                                                               | 136 (40.6)                             |                                                  |
| Thin                                                                 | 3 (0.9)                                |                                                  |
| <b>Intactness of carcasses prior to sampling</b>                     | <b>315 (85.8)</b>                      | <b>52 (14.2)</b>                                 |
| Intact carcass                                                       | 20 (5.4)                               |                                                  |
| Open carcass                                                         | 295 (80.4)                             |                                                  |
