# Supplementary material for: Practical and effective diagnosis of animal anthrax in endemic low-resource settings
Source: PubMed Central journal article supplement (PMC7513992; doi:10.1371/journal.pntd.0008655), 2020-09-14
Supplement: pntd.0008655.s005.pdf [file pntd.0008655.s005.pdf]

**S 4 Table. Comparison of capsule scores obtained with polychrome methylene blue and azure B**

| Capsule strength | Number of samples using azure B stain (n= 102) | Number of samples using polychrome methylene blue stain (n= 102) |
|------------------|------------------------------------------------|------------------------------------------------------------------|
| 0                | 40                                             | 40                                                               |
| +/-              | 10                                             | 9                                                                |
| 1+               | 14                                             | 23                                                               |
| 2+               | 26                                             | 20                                                               |
| 3+               | 12                                             | 10                                                               |
